# Supplementary material for: Development and Validation of Stability-Indicating Assay Method for a Novel Oxazolidinone (PH-192) with Anticonvulsant Activity by Using UHPLC-QToF-MS
Source: MDPI journal article supplement (doi:10.3390/molecules27031090), 2022-02-06
Supplement: s1 [file s1]

## Supplementary Materials

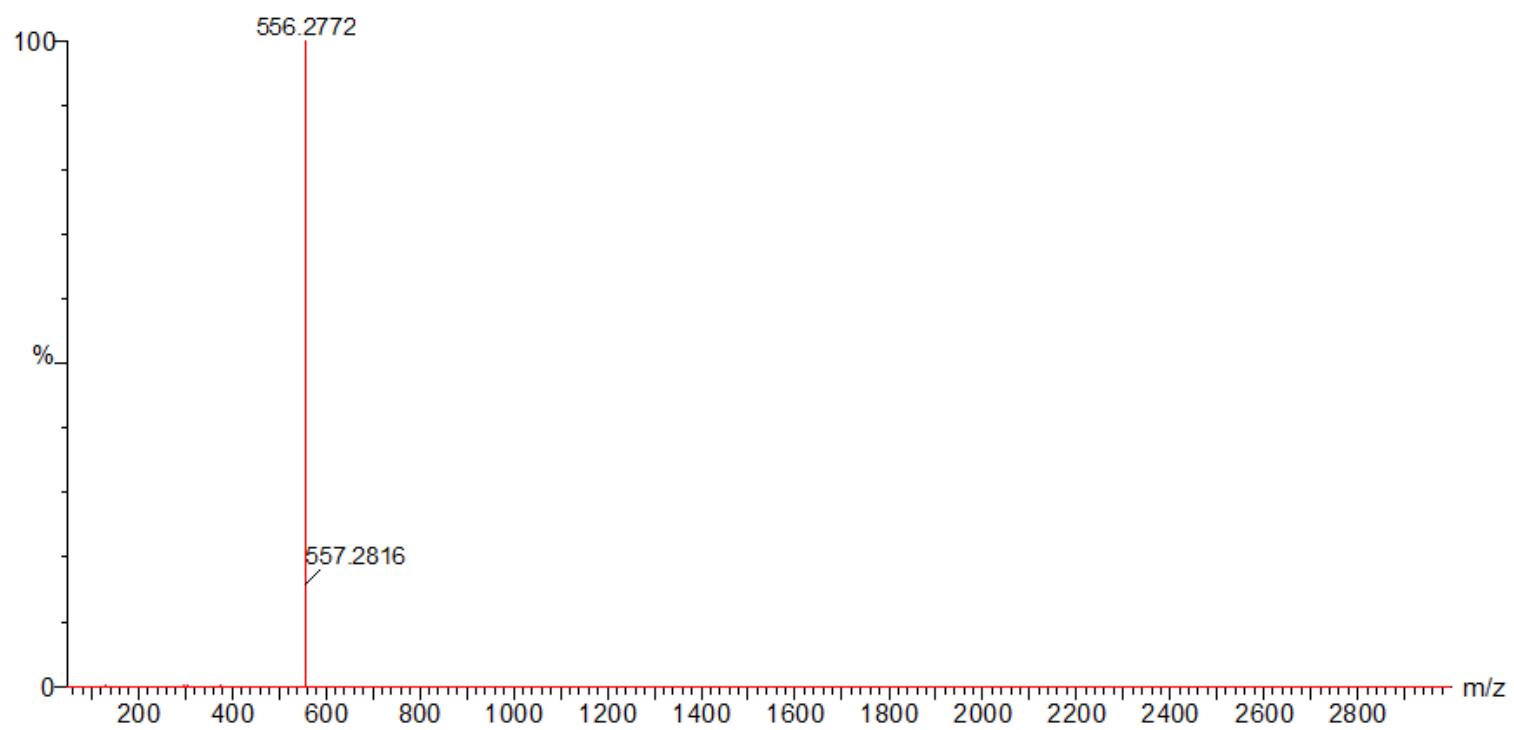

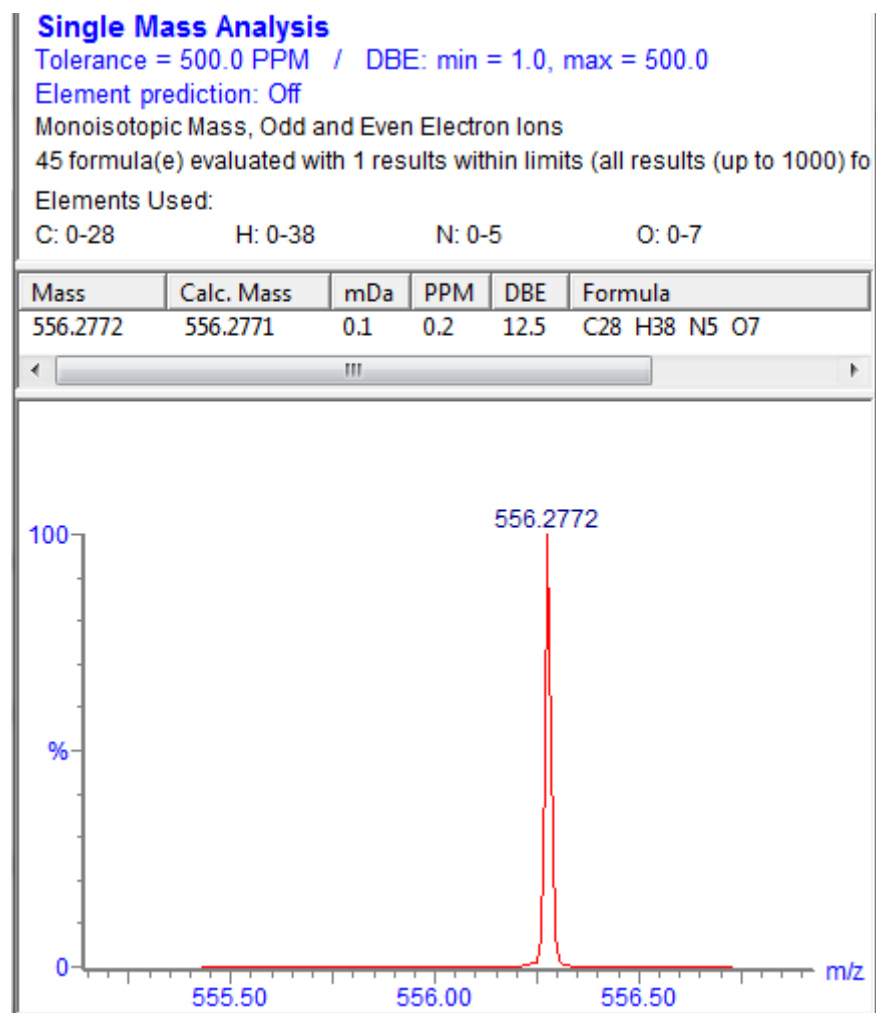

Figure S1. Spectrum for Leucine enkephalin as internal standard for mass spectrometry calibration.

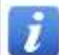

Accept - Create Calibration (Assisted)

The calibration was accepted by the user.

### Summary

RMS residual mass: 0.9 ppm (0.3 mDa)

95% confidence band: 1.0 ppm

Matched: 16 of 17 peaks

Action: Create Calibration (Assisted)

Calibration Profile: NaF\_10JAN2021\_50\_1200\_MS CAL

Mass Range: 50 to 1,200 Da

Mode: Resolution

Polarity: Positive

Flow Rate: 10.00

Calibration File: C:\MassLynx\IntelliStart\Results\NaF\_10JAN2021\_50\_1200\_MS CAL-1.cal

Data File: C:\MassLynx\IntelliStart.PRO\Data\NaF\_10JAN2021\_50\_1200\_MS CAL-2021-01-11-12-53-2.raw

Raw Data (0)

Reference File: C:\MassLynx\Ref\ESI\_NaFormate\_Pos.ref (Sodium Formate)

Cone Voltage Used: 30.00

Capillary Voltage Used: 3.00

Instrument Id: XEVO-G2SQTOF#NotSet

Computer Name: MASSLYNX

Software Version: MassLynx 4.1 SCN884

User Name: waters

**Data**

| Index | Reference mass | Measured mass | Intensity | Mass Resolution | Peak Width | Status |
|-------|----------------|---------------|-----------|-----------------|------------|--------|
| 1     | 90.9772        | 91.1780       | 24,850    | 10,662          | 0.00860    | ✓ Pass |
| 2     | 158.9646       | 159.1698      | 183,193   | 13,546          | 0.01170    | ✓ Pass |
| 3     | 226.9520       | 227.1394      | 919,605   | 16,982          | 0.01340    | ✓ Pass |
| 4     | 294.9395       | Not Found     | -         | -               | -          | ✗ Fail |
| 5     | 362.9269       | 363.0461      | 416,969   | 20,659          | 0.01760    | ✓ Pass |
| 6     | 430.9143       | 430.9897      | 895,931   | 22,334          | 0.01930    | ✓ Pass |
| 7     | 498.9017       | 498.9282      | 592,390   | 22,973          | 0.02170    | ✓ Pass |
| 8     | 566.8892       | 566.8627      | 742,282   | 24,242          | 0.02340    | ✓ Pass |
| 9     | 634.8766       | 634.7939      | 810,278   | 25,418          | 0.02500    | ✓ Pass |
| 10    | 702.8640       | 702.7222      | 902,266   | 26,456          | 0.02660    | ✓ Pass |
| 11    | 770.8514       | 770.6487      | 708,241   | 27,321          | 0.02820    | ✓ Pass |
| 12    | 838.8388       | 838.5729      | 697,228   | 28,016          | 0.02990    | ✓ Pass |
| 13    | 906.8262       | 906.4958      | 476,374   | 29,010          | 0.03120    | ✓ Pass |

| Index | Reference mass | Measured mass | Intensity | Mass Resolution | Peak Width | Status |
|-------|----------------|---------------|-----------|-----------------|------------|--------|
| 14    | 974.8137       | 974.4172      | 400,608   | 28,684          | 0.03400    | ✓ Pass |
| 15    | 1,042.8011     | 1,042.3370    | 311,947   | 30,254          | 0.03450    | ✓ Pass |
| 16    | 1,110.7886     | 1,110.2551    | 222,529   | 30,741          | 0.03610    | ✓ Pass |
| 17    | 1,178.7760     | 1,178.1725    | 167,802   | 29,265          | 0.04030    | ✓ Pass |

17 Reference Peaks: 16 matched, 1 un-matched.

Calibration Chart:

**Reference mass**

974.8137

1,042.8011

1,110.7886

1,178.7760

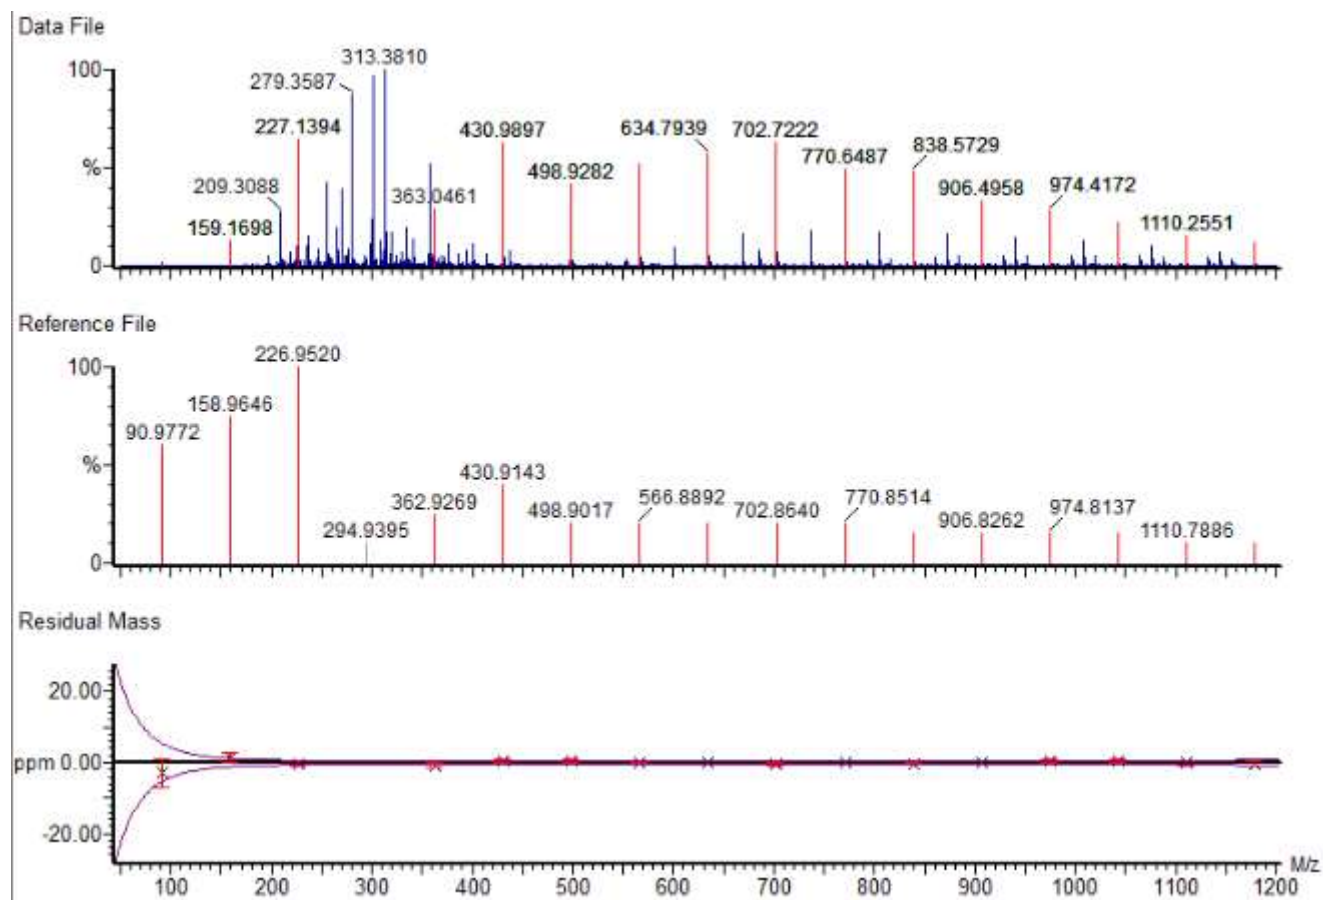

Figure S2. Mass Spectrometry accuracy assessment achieved using 0.5  $\mu$ M sodium formate.

## Results

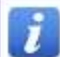

Accept - Create Calibration (Assisted)

The calibration was accepted by the user.

## Summary

RMS residual mass: 0.9 ppm (0.3 mDa)

95% confidence band: 1.0 ppm

Matched: 16 of 17 peaks

Action: Create Calibration (Assisted)

Calibration Profile: NaF\_10JAN2021\_50\_1200\_MS CAL

Mass Range: 50 to 1,200 Da

Mode: Resolution

Polarity: Positive

Flow Rate: 10.00

Calibration File: [C:\MassLynx\IntelliStart\Results\NaF\\_10JAN2021\\_50\\_1200\\_MS CAL-1.cal](C:\MassLynx\IntelliStart\Results\NaF_10JAN2021_50_1200_MS CAL-1.cal)

Data File: [C:\MassLynx\IntelliStart.PRO\Data\NaF\\_10JAN2021\\_50\\_1200\\_MS CAL-2021-01-11-12-53-2.raw](C:\MassLynx\IntelliStart.PRO\Data\NaF_10JAN2021_50_1200_MS CAL-2021-01-11-12-53-2.raw)  
Raw Data (0)

Reference File: [C:\MassLynx\Ref\ESI\\_NaFormate\\_Pos.ref](C:\MassLynx\Ref\ESI_NaFormate_Pos.ref) (Sodium Formate)

Cone Voltage Used: 30.00

Capillary Voltage Used: 3.00

Instrument Id: XEVO-G2SQTOF#NotSet

Computer Name: MASSLYNX

Software Version: MassLynx 4.1 SCN884

User Name: waters

**Data**

| Index | Reference mass | Measured mass | Intensity | Mass Resolution | Peak Width | Status |
|-------|----------------|---------------|-----------|-----------------|------------|--------|
| 1     | 90.9772        | 91.1780       | 24,850    | 10,662          | 0.00860    | ✓ Pass |
| 2     | 158.9646       | 159.1698      | 183,193   | 13,546          | 0.01170    | ✓ Pass |
| 3     | 226.9520       | 227.1394      | 919,605   | 16,982          | 0.01340    | ✓ Pass |
| 4     | 294.9395       | Not Found     | -         | -               | -          | ✗ Fail |
| 5     | 362.9269       | 363.0461      | 416,969   | 20,659          | 0.01760    | ✓ Pass |
| 6     | 430.9143       | 430.9897      | 895,931   | 22,334          | 0.01930    | ✓ Pass |
| 7     | 498.9017       | 498.9282      | 592,390   | 22,973          | 0.02170    | ✓ Pass |
| 8     | 566.8892       | 566.8627      | 742,282   | 24,242          | 0.02340    | ✓ Pass |
| 9     | 634.8766       | 634.7939      | 810,278   | 25,418          | 0.02500    | ✓ Pass |
| 10    | 702.8640       | 702.7222      | 902,266   | 26,456          | 0.02660    | ✓ Pass |
| 11    | 770.8514       | 770.6487      | 708,241   | 27,321          | 0.02820    | ✓ Pass |
| 12    | 838.8388       | 838.5729      | 697,228   | 28,016          | 0.02990    | ✓ Pass |
| 13    | 906.8262       | 906.4958      | 476,374   | 29,010          | 0.03120    | ✓ Pass |

| Index | Reference mass | Measured mass | Intensity | Mass Resolution | Peak Width | Status |
|-------|----------------|---------------|-----------|-----------------|------------|--------|
| 14    | 974.8137       | 974.4172      | 400,608   | 28,684          | 0.03400    | ✓ Pass |
| 15    | 1,042.8011     | 1,042.3370    | 311,947   | 30,254          | 0.03450    | ✓ Pass |
| 16    | 1,110.7886     | 1,110.2551    | 222,529   | 30,741          | 0.03610    | ✓ Pass |
| 17    | 1,178.7760     | 1,178.1725    | 167,802   | 29,265          | 0.04030    | ✓ Pass |

17 Reference Peaks: 16 matched, 1 un-matched.



Calibration Chart:

**Reference mass**

974.8137

1,042.8011

1,110.7886

1,178.7760

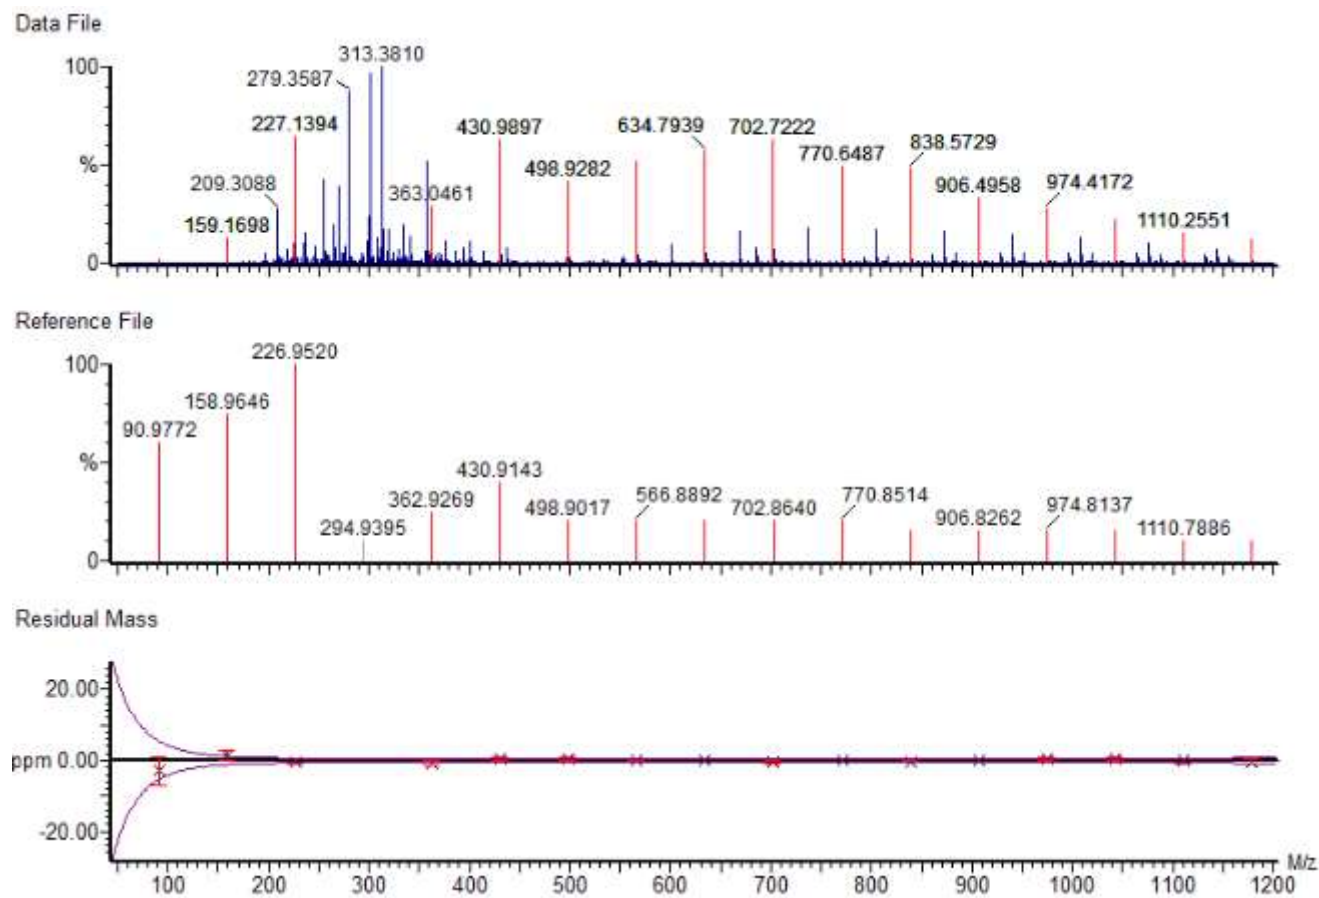

Figure S3. Mass Spectrometry resolution assessment achieved using 0.5  $\mu$ M sodium formate.
